# Supplementary material
Source: publisher site journal article supplement (https://www.spandidos-publications.com/174/downloadSupplementary)

Figure S1. Characterization of bone mesenchymal stem cells. (A) Osteogenic differentiation was confirmed by Alizarin red staining. (B) Adipogenic differentiation was confirmed by Oil Red O staining. (C) Chondrogenic differentiation was confirmed by Alcian Blue staining. Scale bar, 150  $\mu$ m.

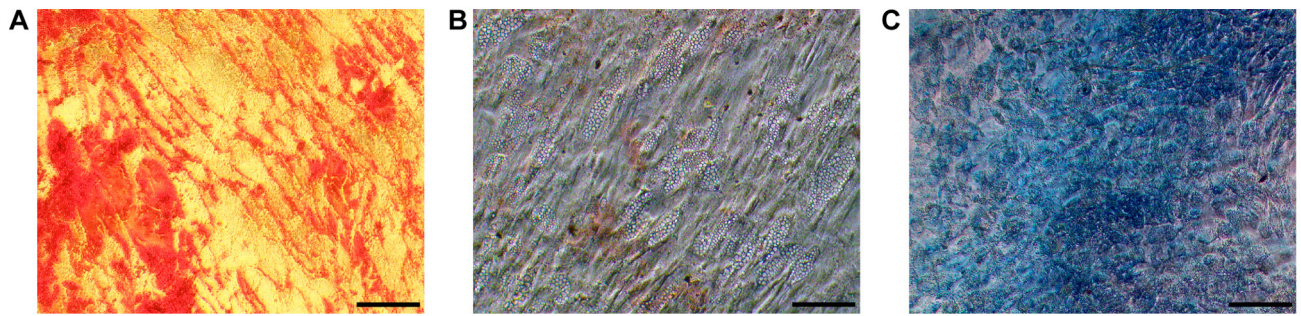

Supplement: Supplementary file 1 [file downloadSupplementary]
